# Supplementary material
Source: PubMed Central journal article supplement (PMC4431889)

# ALZHEIMER'S DISEASE

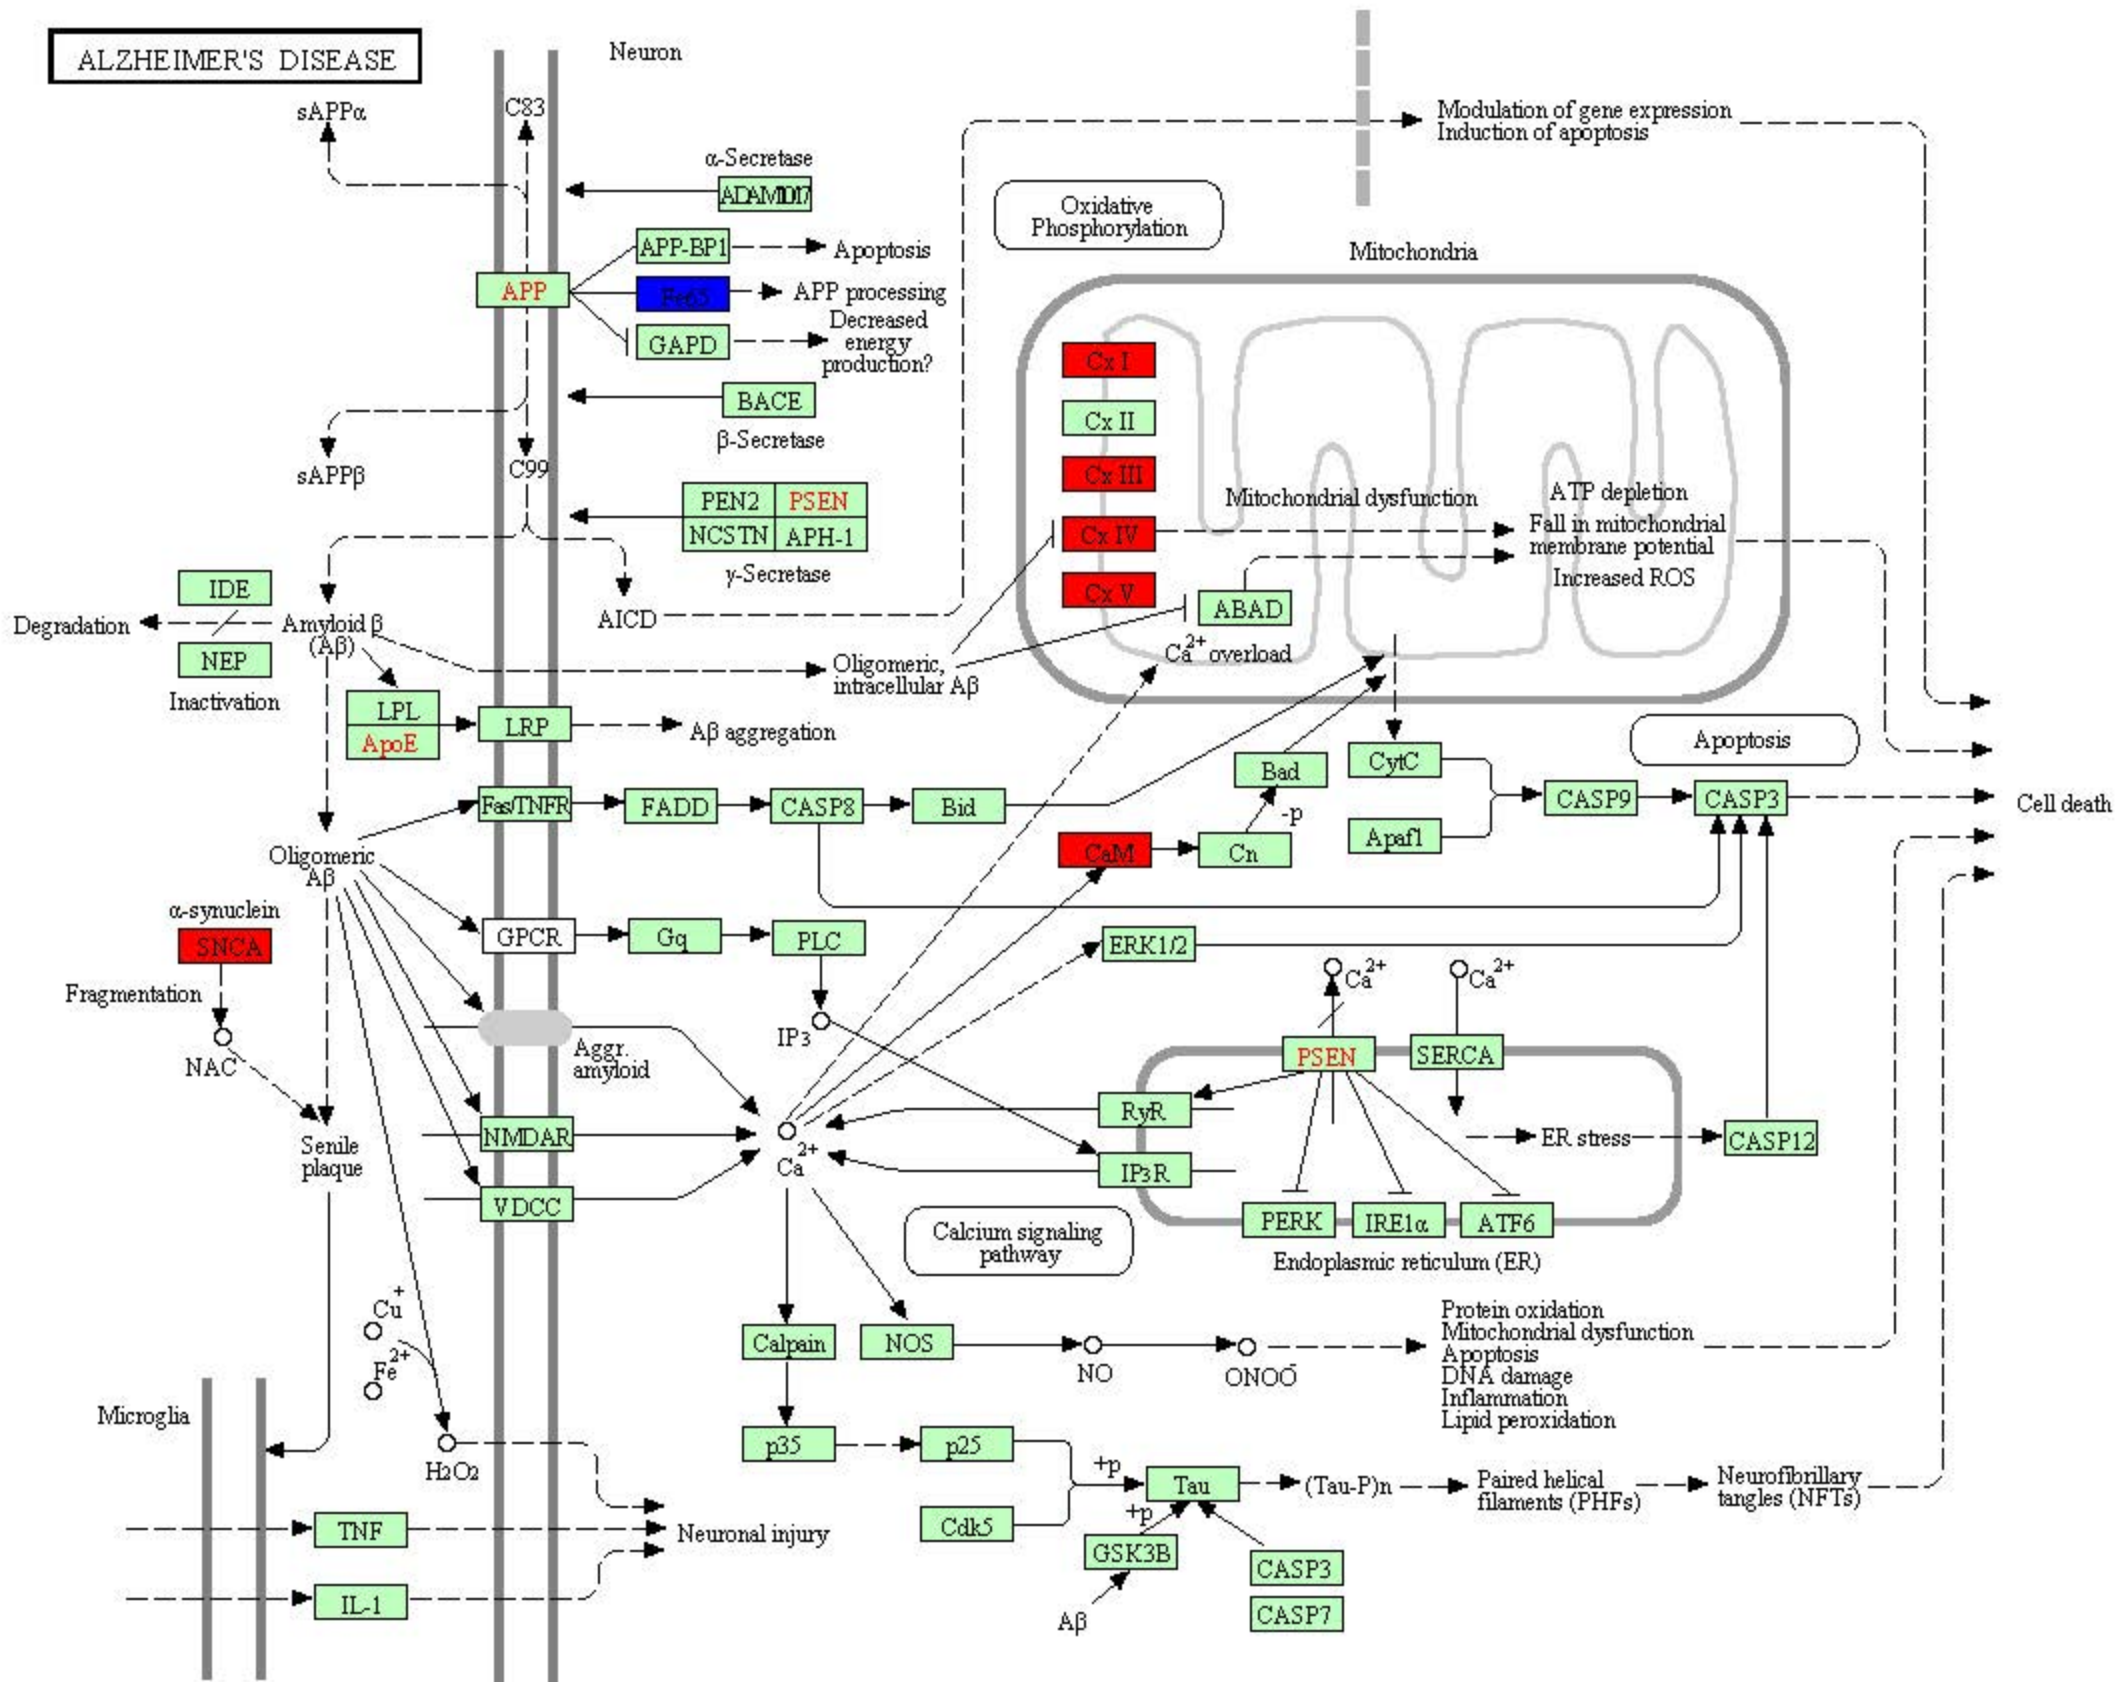

# CARDIAC MUSCLE CONTRACTION

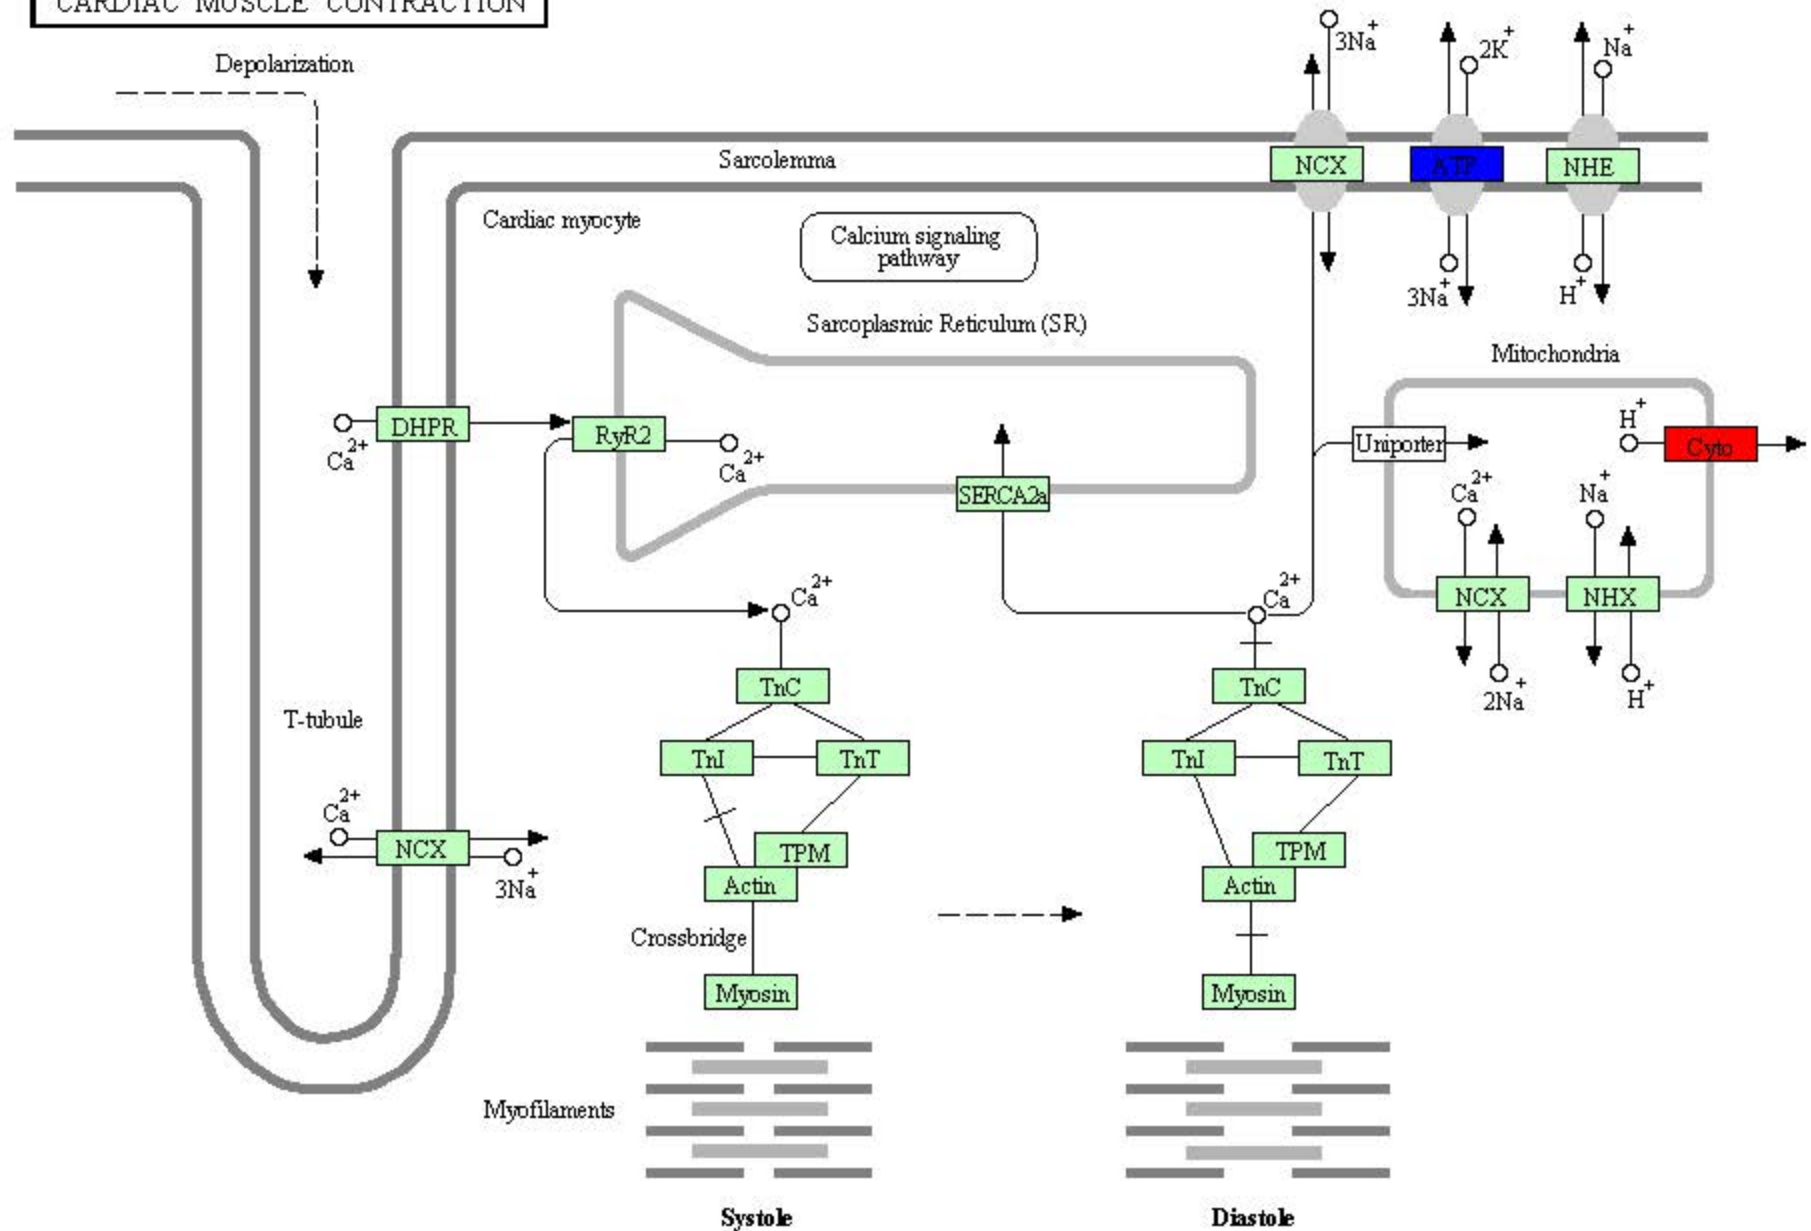

# GAP JUNCTION

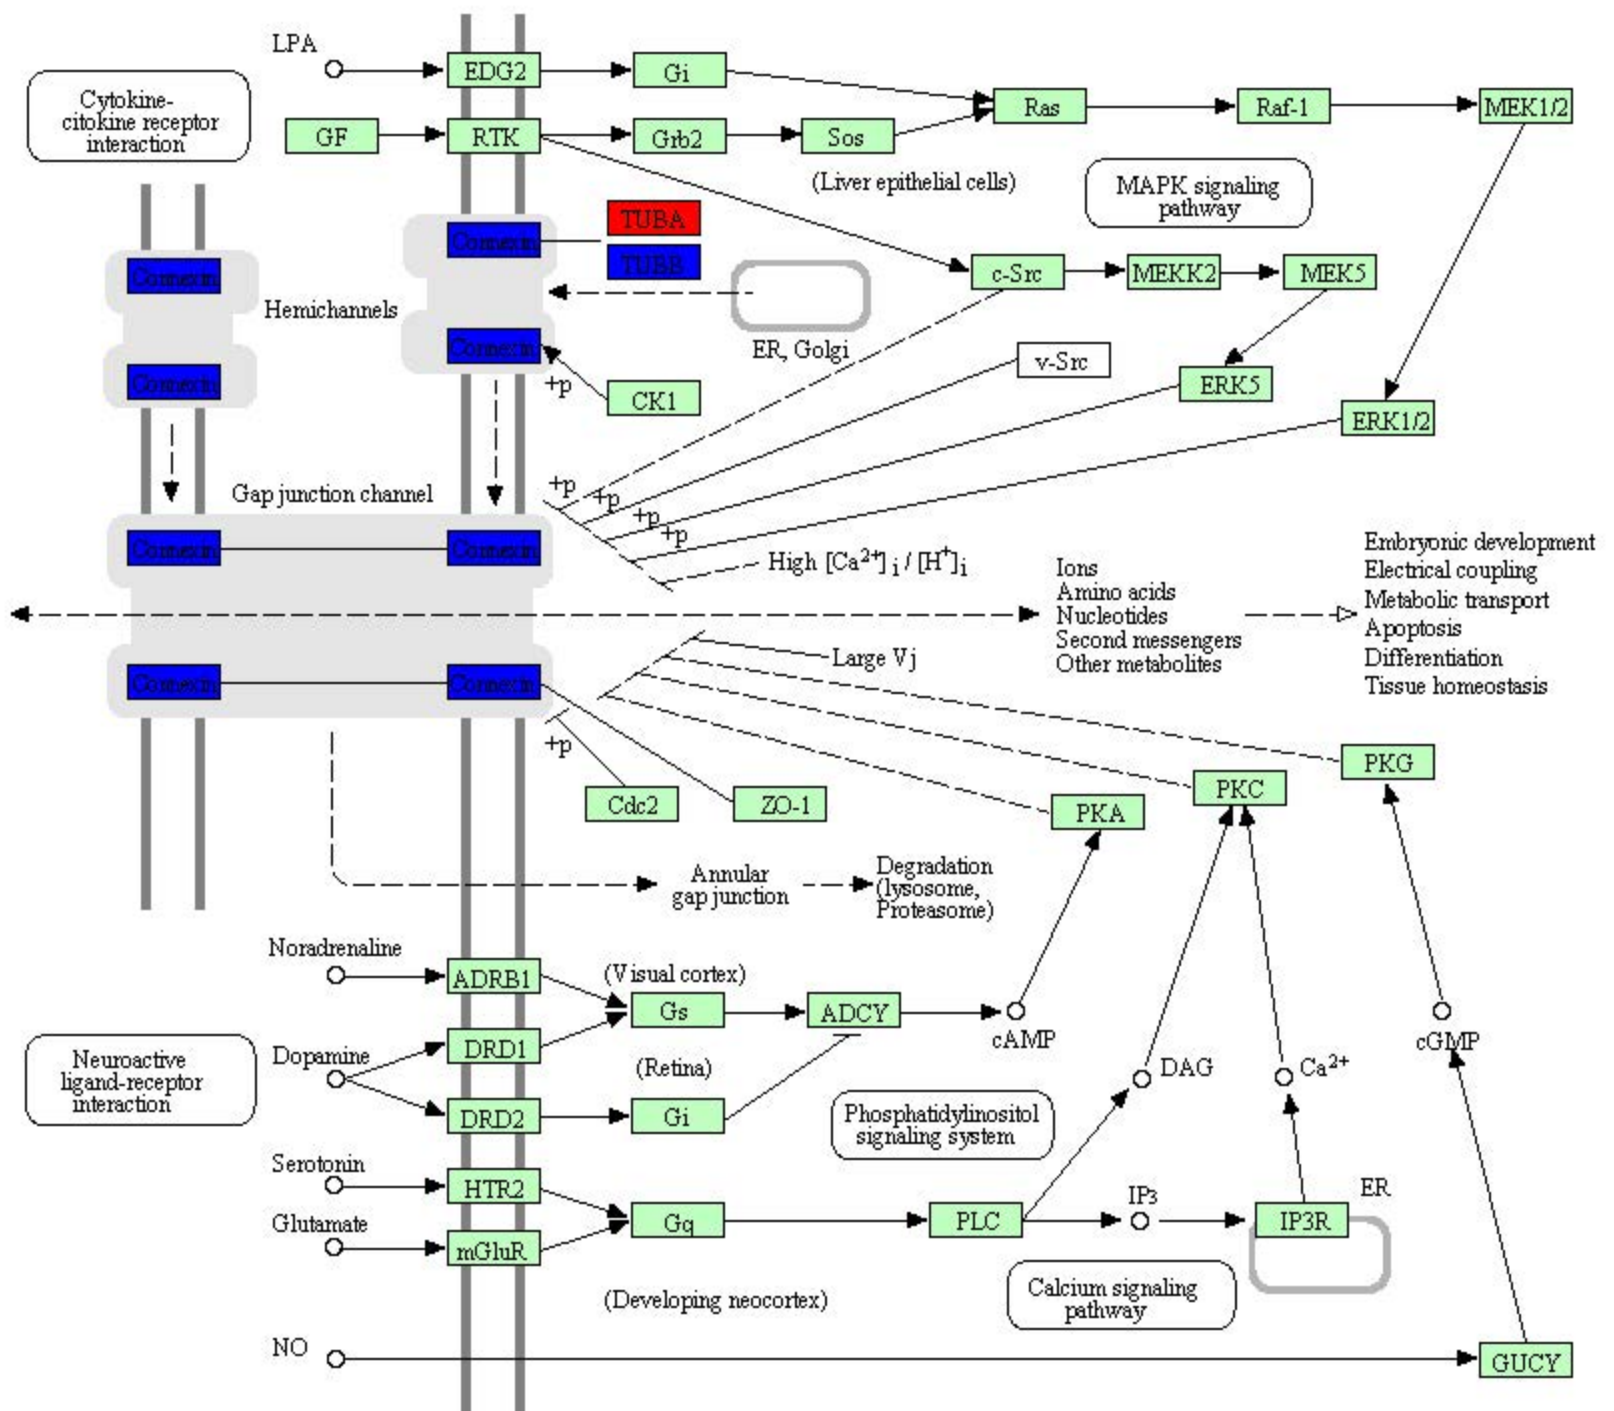

**HUNTINGTON'S DISEASE**

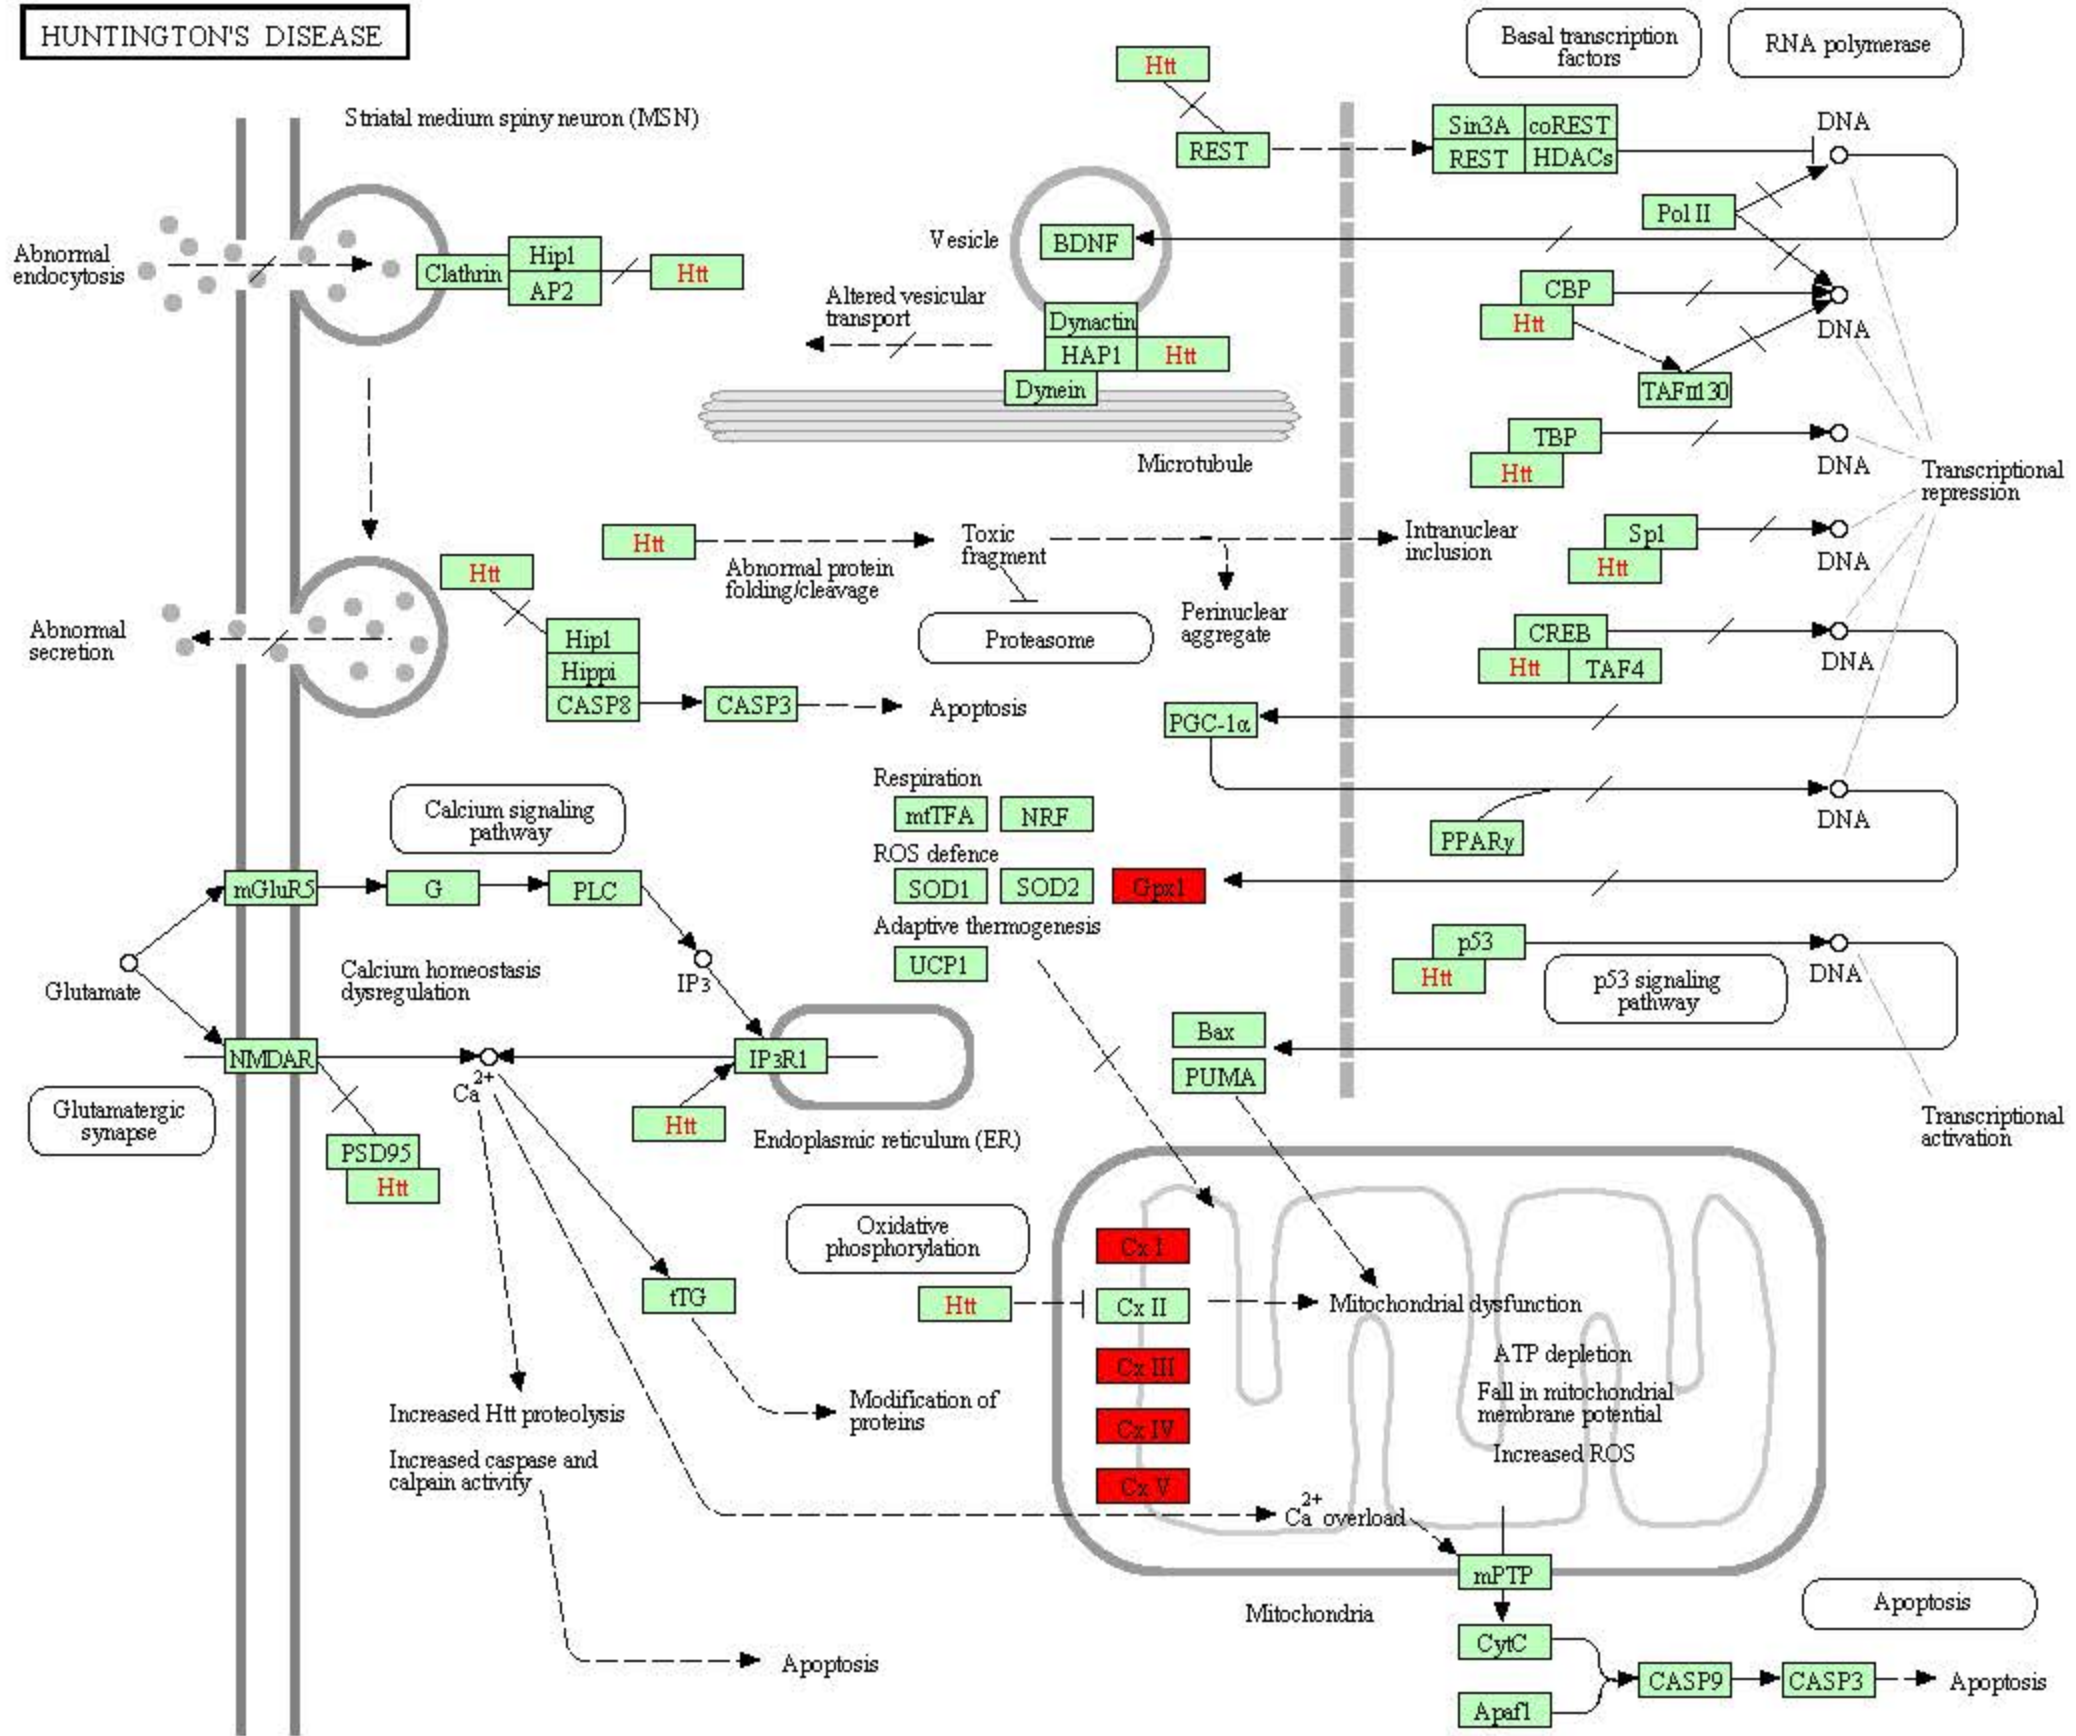

# INSULIN SIGNALING PATHWAY

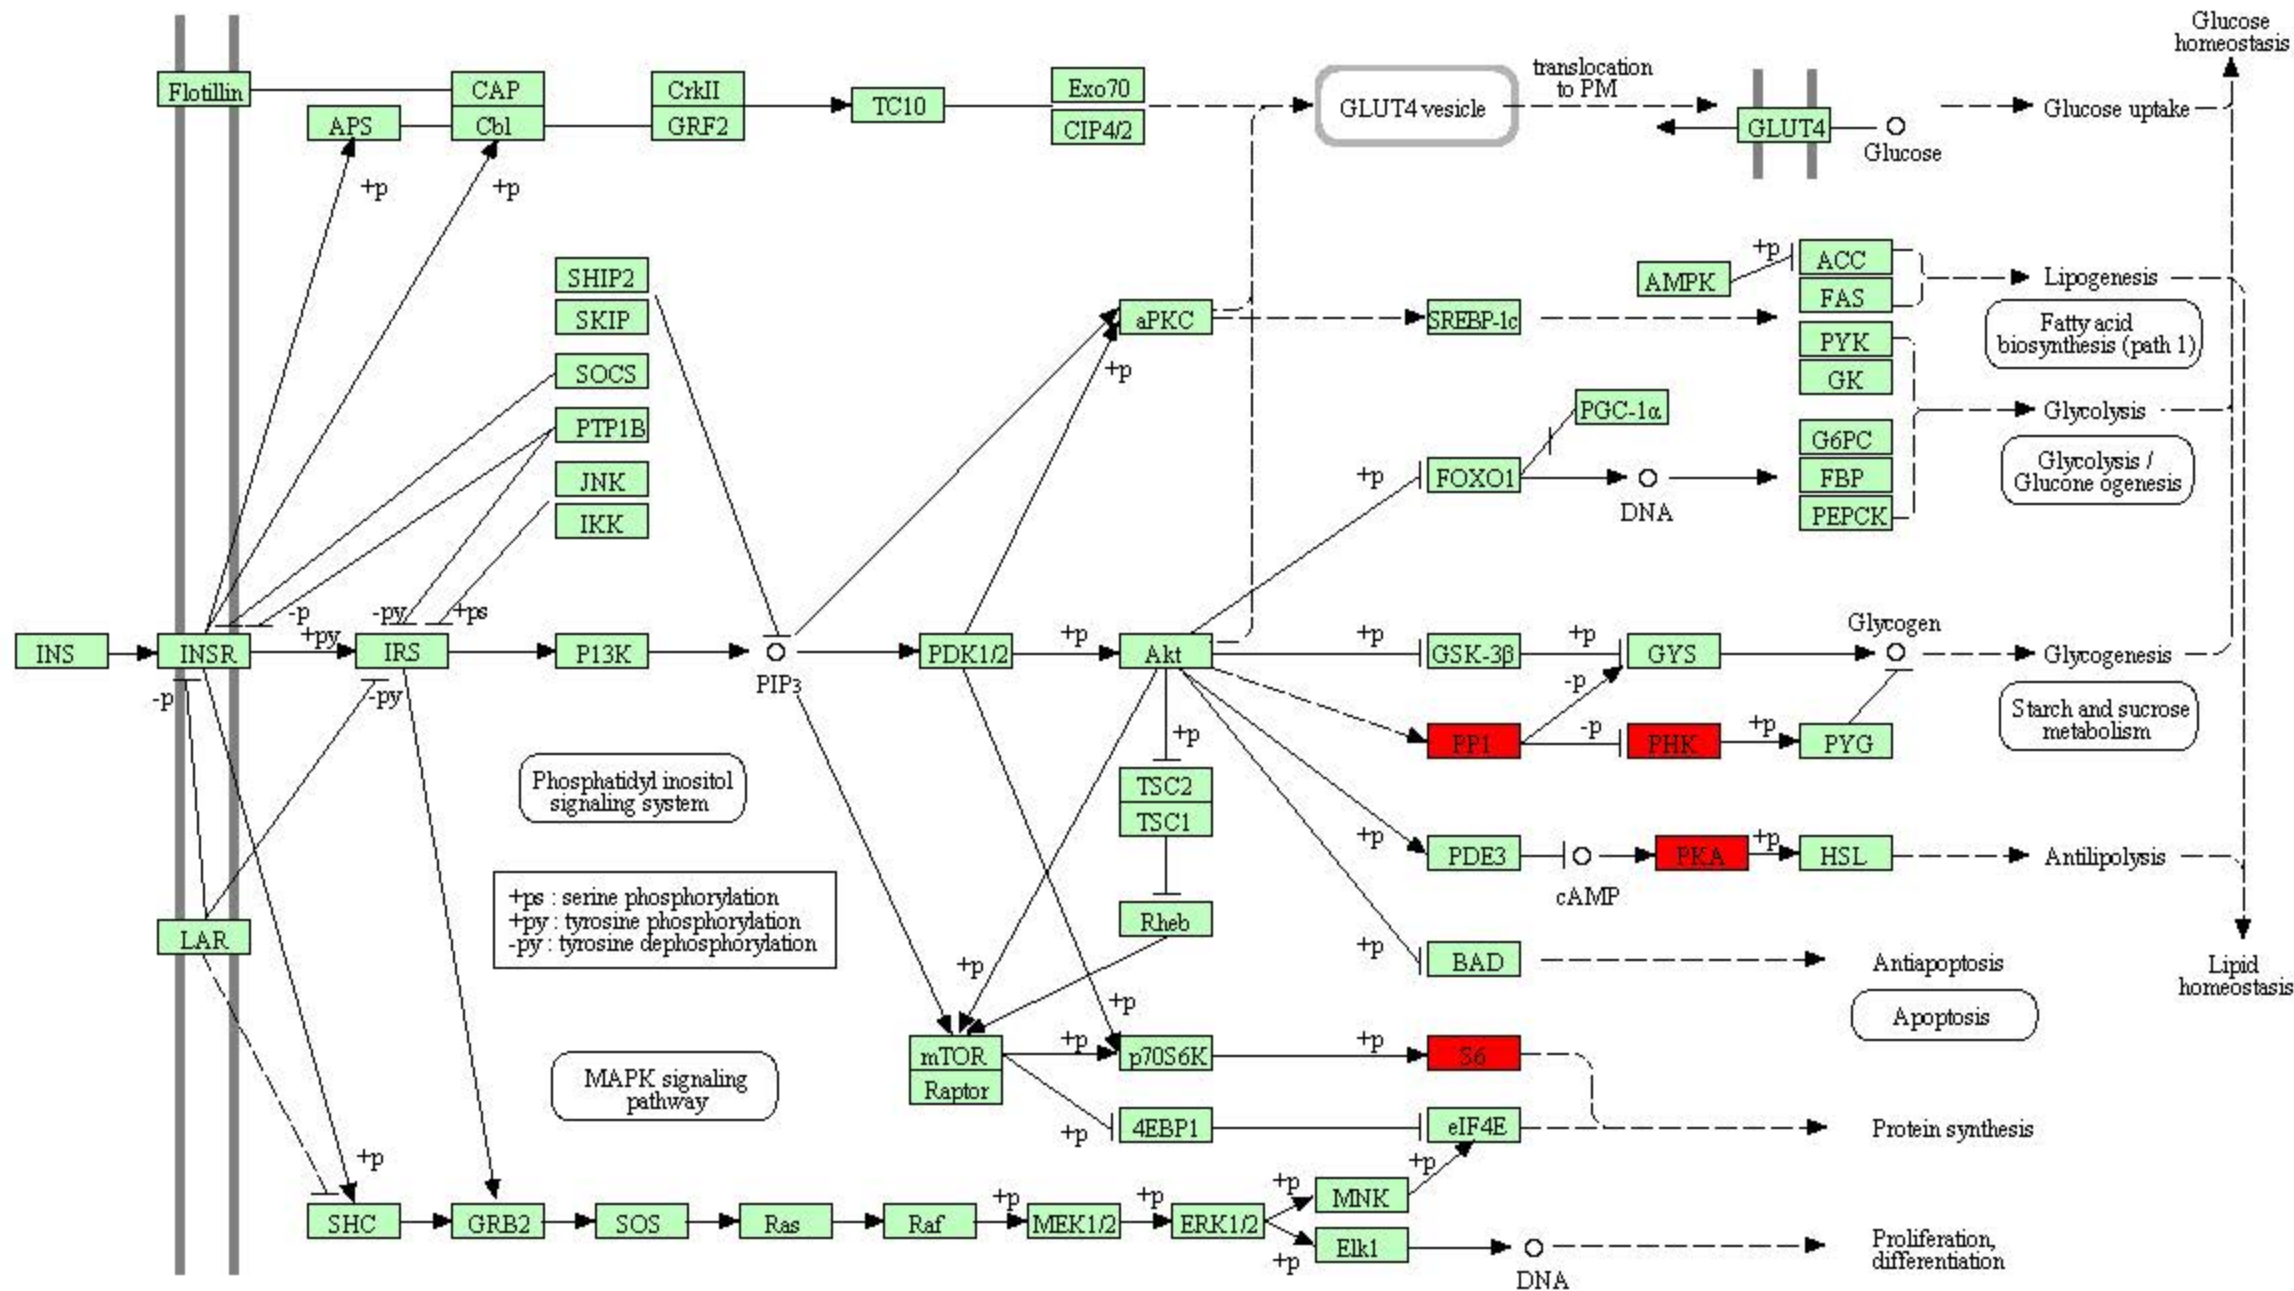

# LONG-TERM POTENTIATION

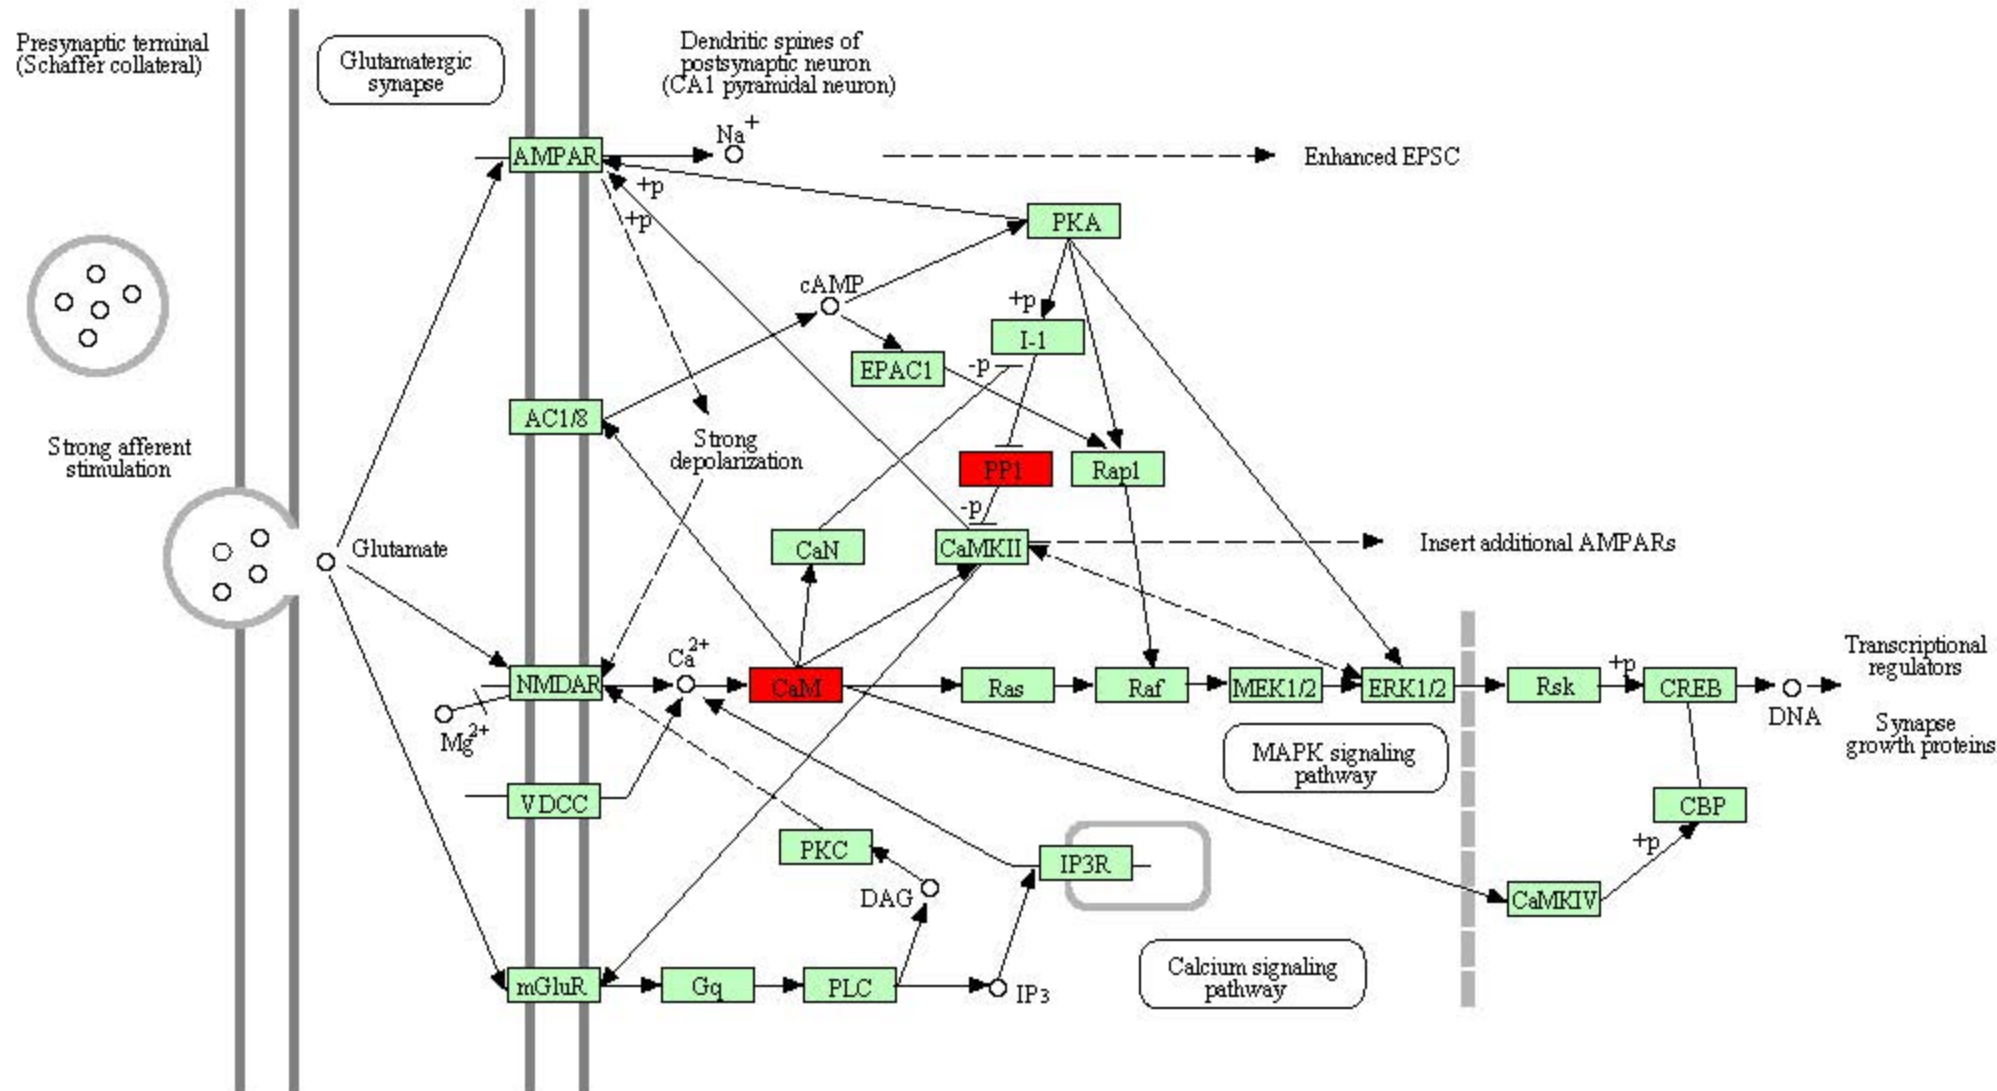

# OXIDATIVE PHOSPHORYLATION

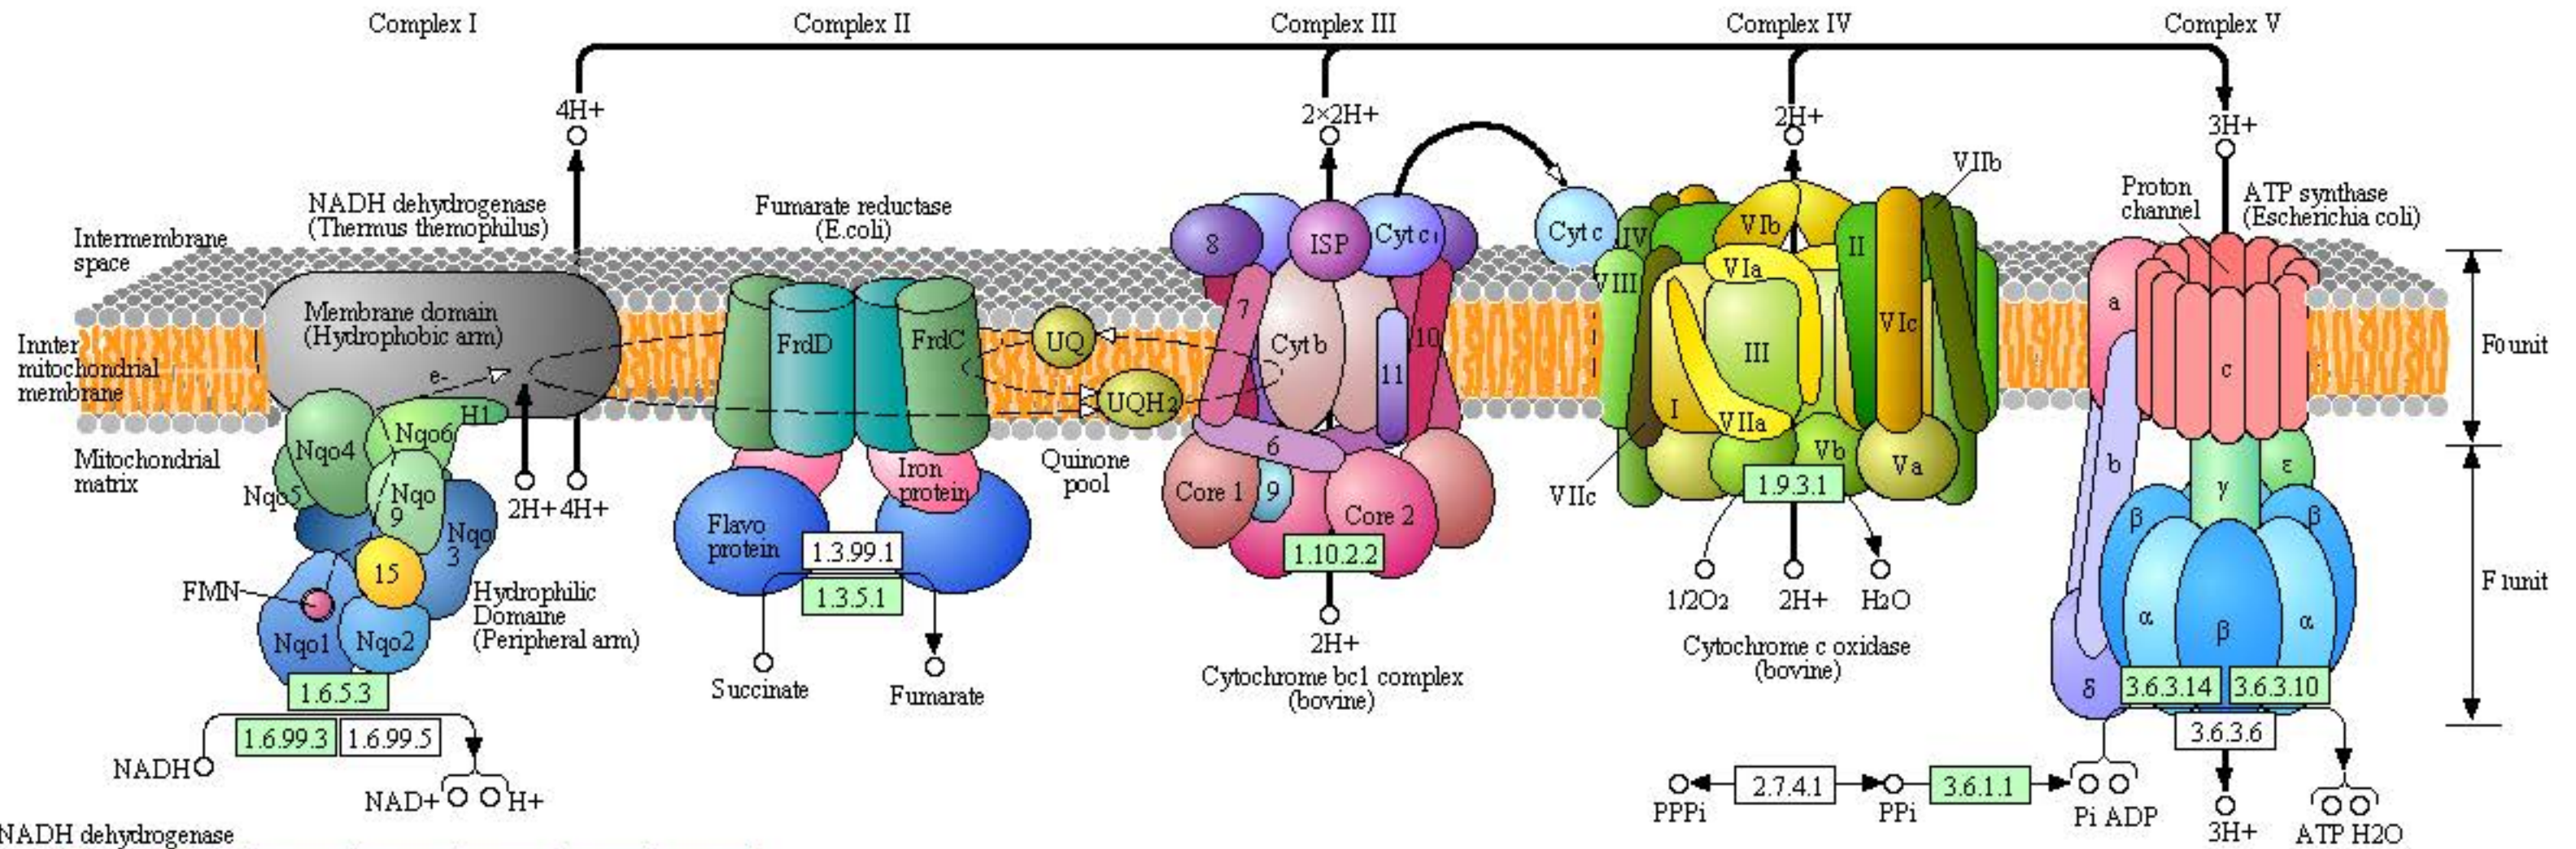

## NADH dehydrogenase

|     |        |        |        |        |        |        |        |        |        |         |         |         |         |         |      |      |      |
|-----|--------|--------|--------|--------|--------|--------|--------|--------|--------|---------|---------|---------|---------|---------|------|------|------|
| E   | ND1    | ND2    | ND3    | ND4    | ND4L   | ND5    | ND6    |        |        |         |         |         |         |         |      |      |      |
| E   | Ndufs1 | Ndufs2 | Ndufs3 | Ndufs4 | Ndufs5 | Ndufs6 | Ndufs7 | Ndufs8 | Ndufv1 | Ndufv2  | Ndufv3  |         |         |         |      |      |      |
| B/A | NuoA   | NuoB   | NuoC   | NuoD   | NuoE   | NuoF   | NuoG   | NuoH   | NuoI   | NuoJ    | NuoK    | NuoL    | NuoM    | NuoN    |      |      |      |
| B/A | NdhC   | NdhK   | NdhJ   | NdhH   | NdhA   | NdhI   | NdhG   | NdhE   | NdhF   | NdhD    | NdhB    | NdhL    | NdhM    | NdhN    | HoxE | HoxF | HoxU |
| E   | Ndufa1 | Ndufa2 | Ndufa3 | Ndufa4 | Ndufa5 | Ndufa6 | Ndufa7 | Ndufa8 | Ndufa9 | Ndufa10 | Ndufab1 | Ndufa11 | Ndufa12 | Ndufa13 |      |      |      |
| E   | Ndufb1 | Ndufb2 | Ndufb3 | Ndufb4 | Ndufb5 | Ndufb6 | Ndufb7 | Ndufb8 | Ndufb9 | Ndufb10 | Ndufb11 | Ndufc1  | Ndufc2  |         |      |      |      |

## Succinate dehydrogenase / Fumarate reductase

|     |      |      |      |      |      |      |      |      |
|-----|------|------|------|------|------|------|------|------|
| E   | SDHC | SDHD | SDHA | SDHB |      |      |      |      |
| B/A | SdhC | SdhD | SdhA | SdhB | FrdA | FrdB | FrdC | FrdD |

## Cytochrome c reductase

|       |      |      |      |      |      |      |       |  |
|-------|------|------|------|------|------|------|-------|--|
| E/B/A | ISP  | Cytb | Cyt1 |      |      |      |       |  |
| E     | COR1 | QCR2 | QCR6 | QCR7 | QCR8 | QCR9 | QCR10 |  |

## Cytochrome c oxidase

|     |       |      |      |      |      |       |       |       |       |       |       |       |       |      |       |       |       |       |  |  |
|-----|-------|------|------|------|------|-------|-------|-------|-------|-------|-------|-------|-------|------|-------|-------|-------|-------|--|--|
| E   | COX10 | COX3 | COX1 | COX2 | COX4 | COX5A | COX5B | COX6A | COX6B | COX6C | COX7A | COX7B | COX7C | COX8 | E/B/A | COX11 | COX15 | COX17 |  |  |
| B/A | CyoE  | CyoD | CyoC | CyoB | CyoA |       |       |       |       |       |       |       |       | CoxD | CoxC  | CoxA  | CoxB  |       |  |  |
|     |       |      |      |      | QoxD | QoxC  | QoxB  | QoxA  |       |       |       |       |       |      |       |       |       |       |  |  |

## Cytochrome c oxidase, cbb3-type

|   |   |    |    |     |
|---|---|----|----|-----|
| B | I | II | IV | III |
|---|---|----|----|-----|

## Cytochrome bd complex

|     |      |      |
|-----|------|------|
| B/A | CydA | CydB |
|-----|------|------|

## F-type ATPase (Bacteria)

|      |       |       |       |         |   |   |   |
|------|-------|-------|-------|---------|---|---|---|
| beta | alpha | gamma | delta | epsilon | c | a | b |
|------|-------|-------|-------|---------|---|---|---|

## F-type ATPase (Eukaryotes)

|      |       |       |      |       |         |   |   |
|------|-------|-------|------|-------|---------|---|---|
| beta | alpha | gamma | OSCP | delta | epsilon | c | a |
| b    | e     | f6    | f    | 8     |         |   |   |
| d    | f     | h     | j    | k     | g       |   |   |

## V-type ATPase (Prokaryotes)

|   |   |   |   |   |   |   |   |
|---|---|---|---|---|---|---|---|
| A | B | C | D | E | F | I | K |
|---|---|---|---|---|---|---|---|

## V-type ATPase (Eukaryotes)

|   |      |      |    |       |   |   |   |
|---|------|------|----|-------|---|---|---|
| A | B    | C    | D  | E     | F | G | H |
| I | AC39 | 54kD | S1 | lipid |   |   |   |

**PARKINSON'S DISEASE**

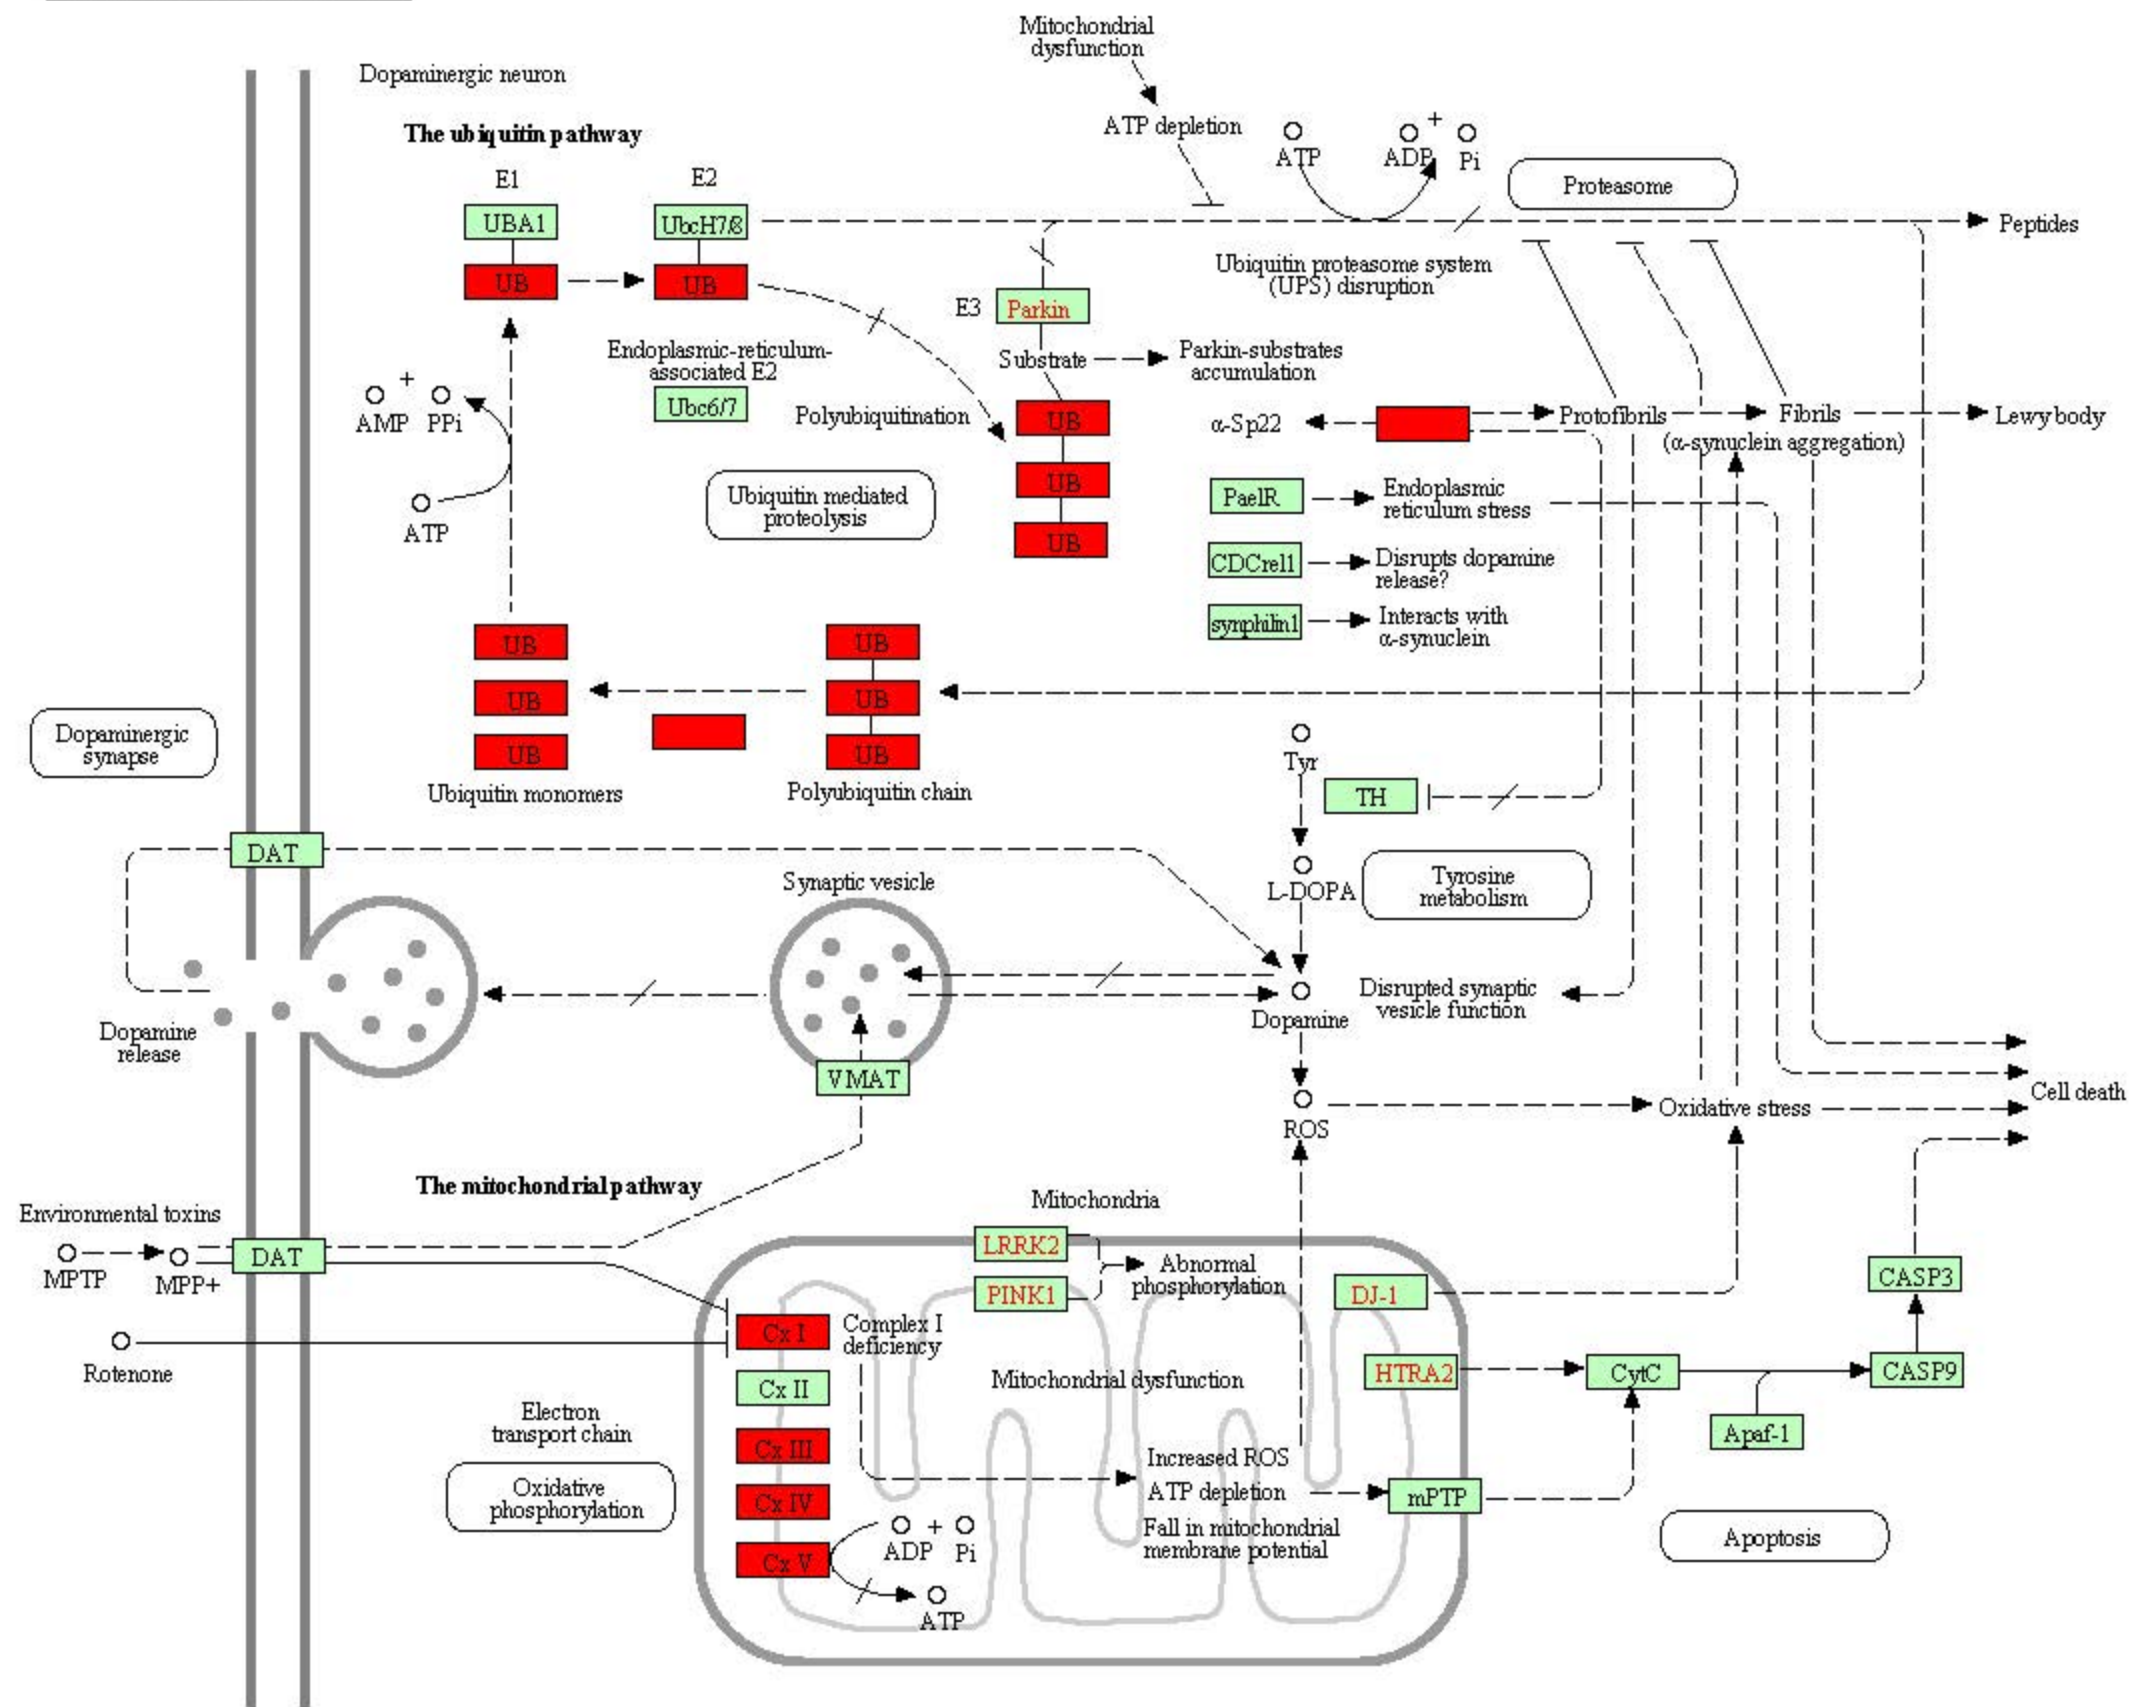



PHOSPHATIDYLINOSITOL SIGNALING SYSTEM

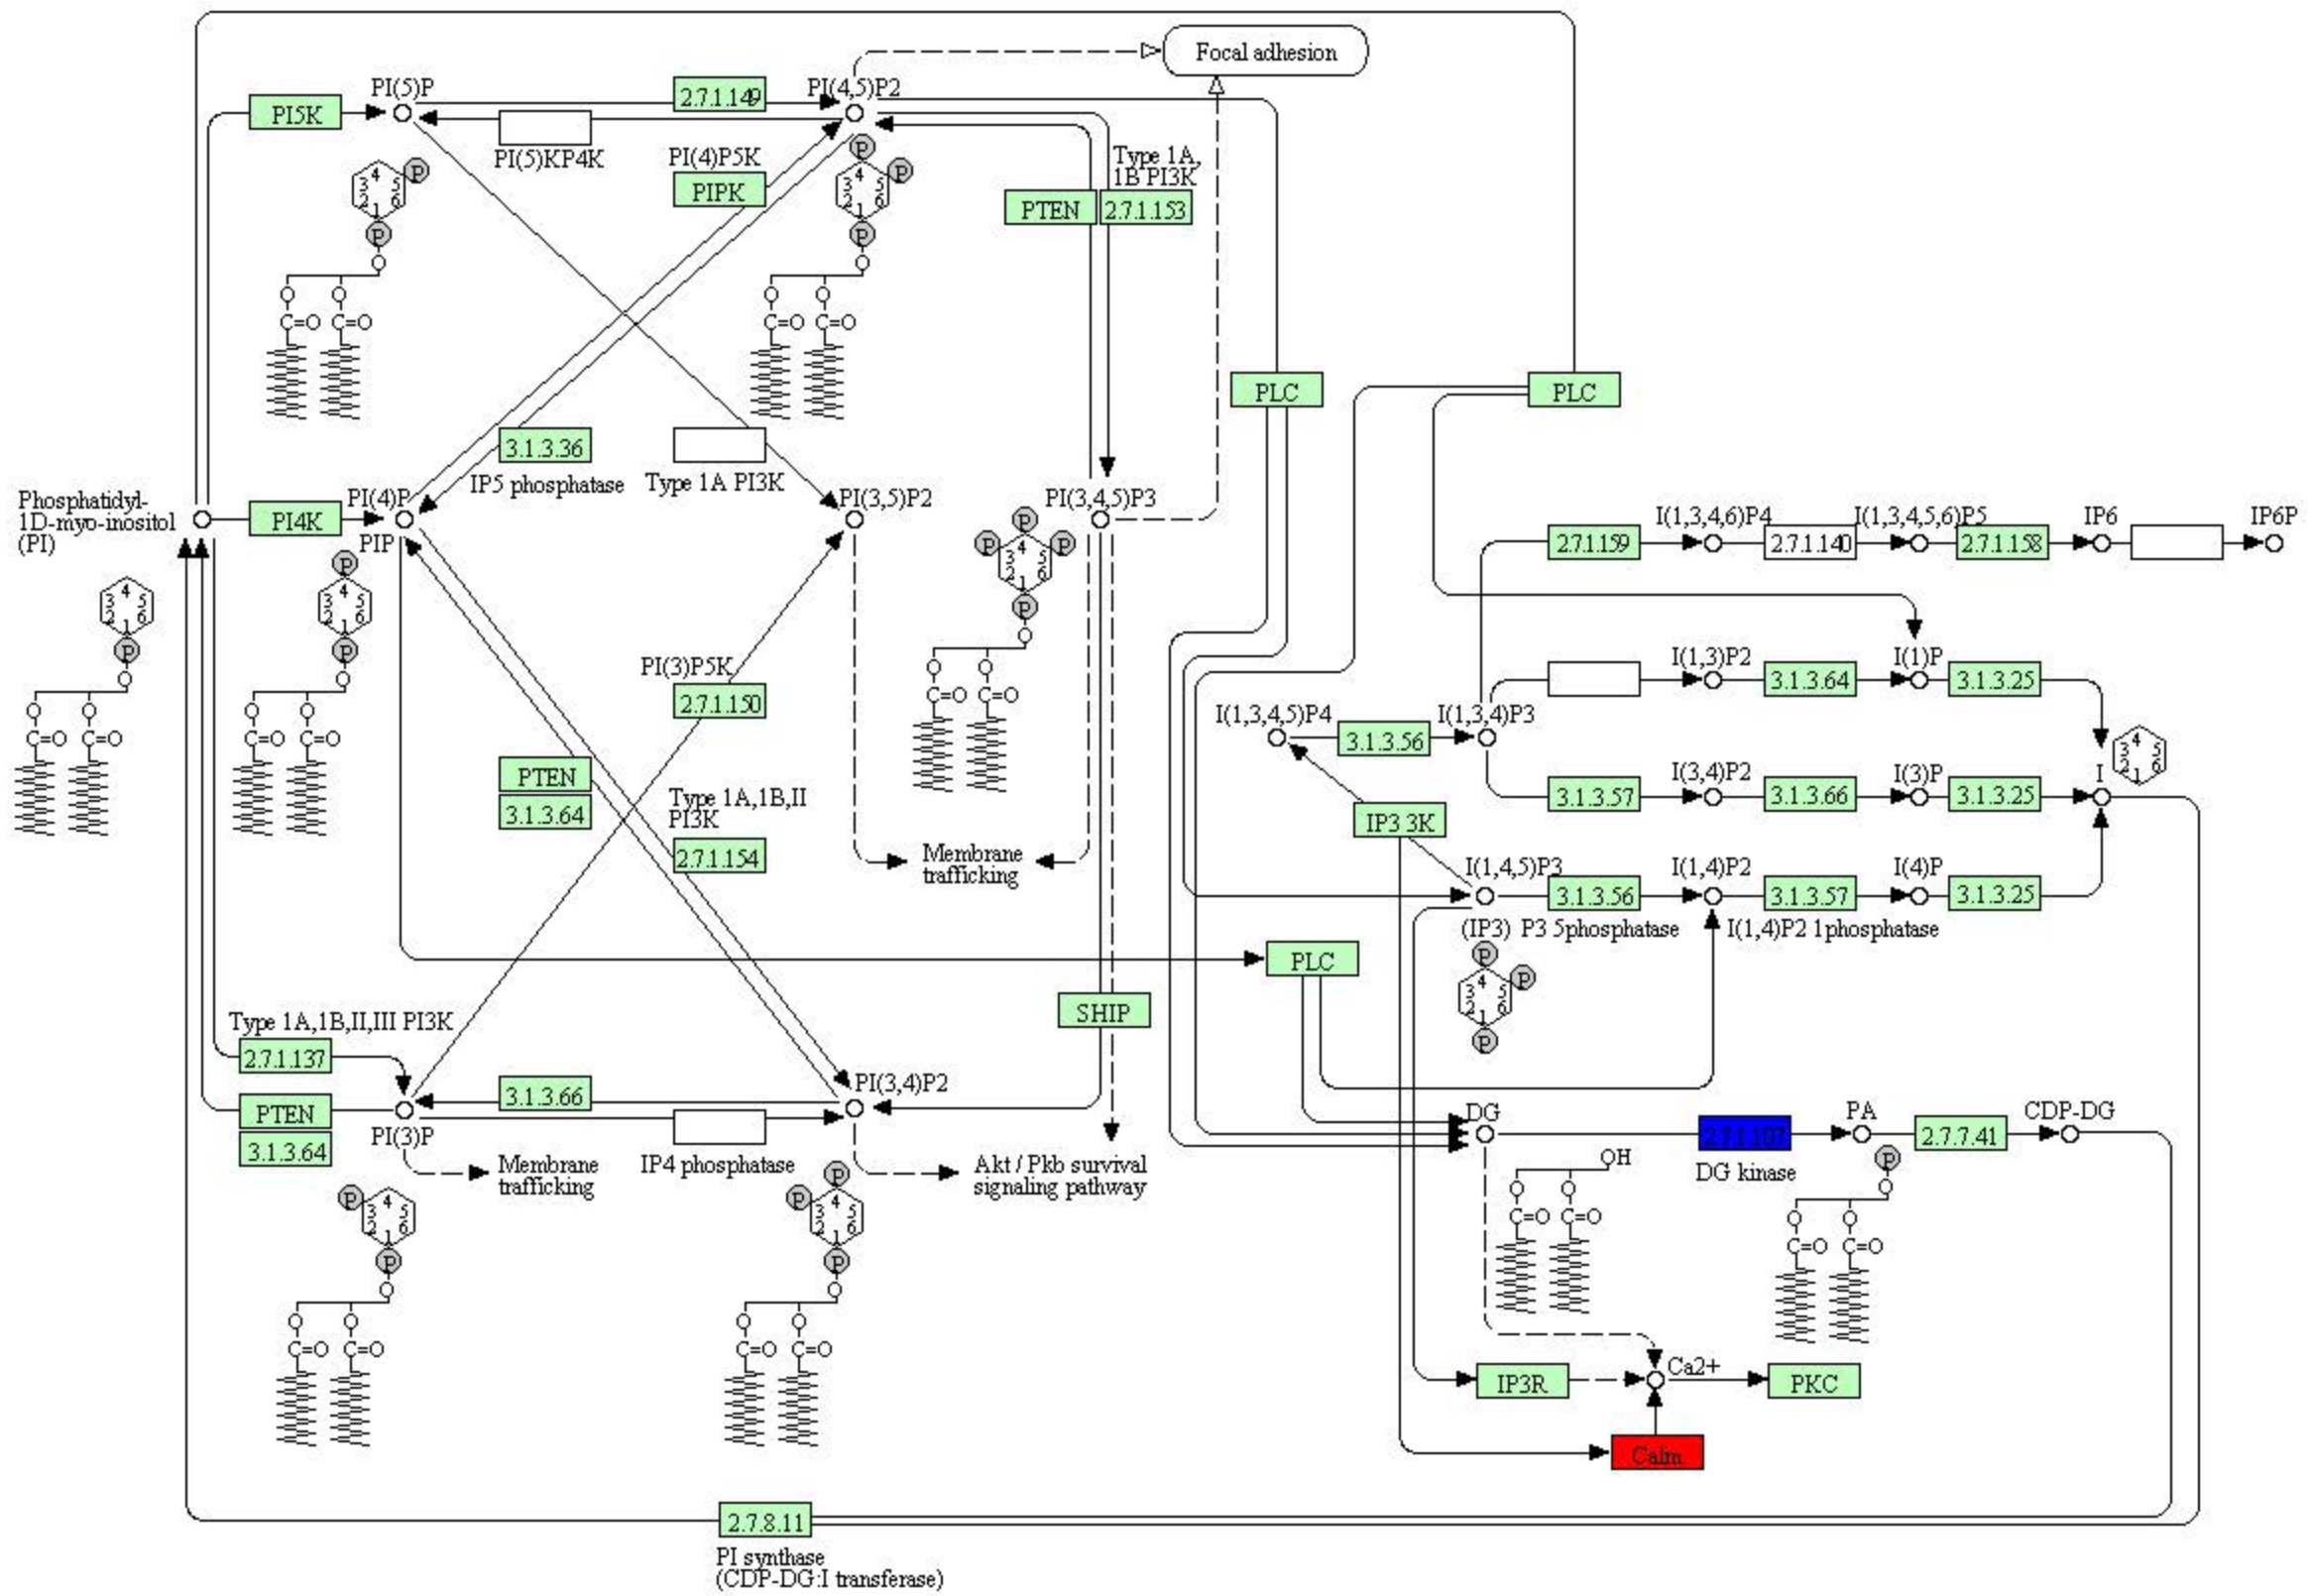

**PROTEASOME**

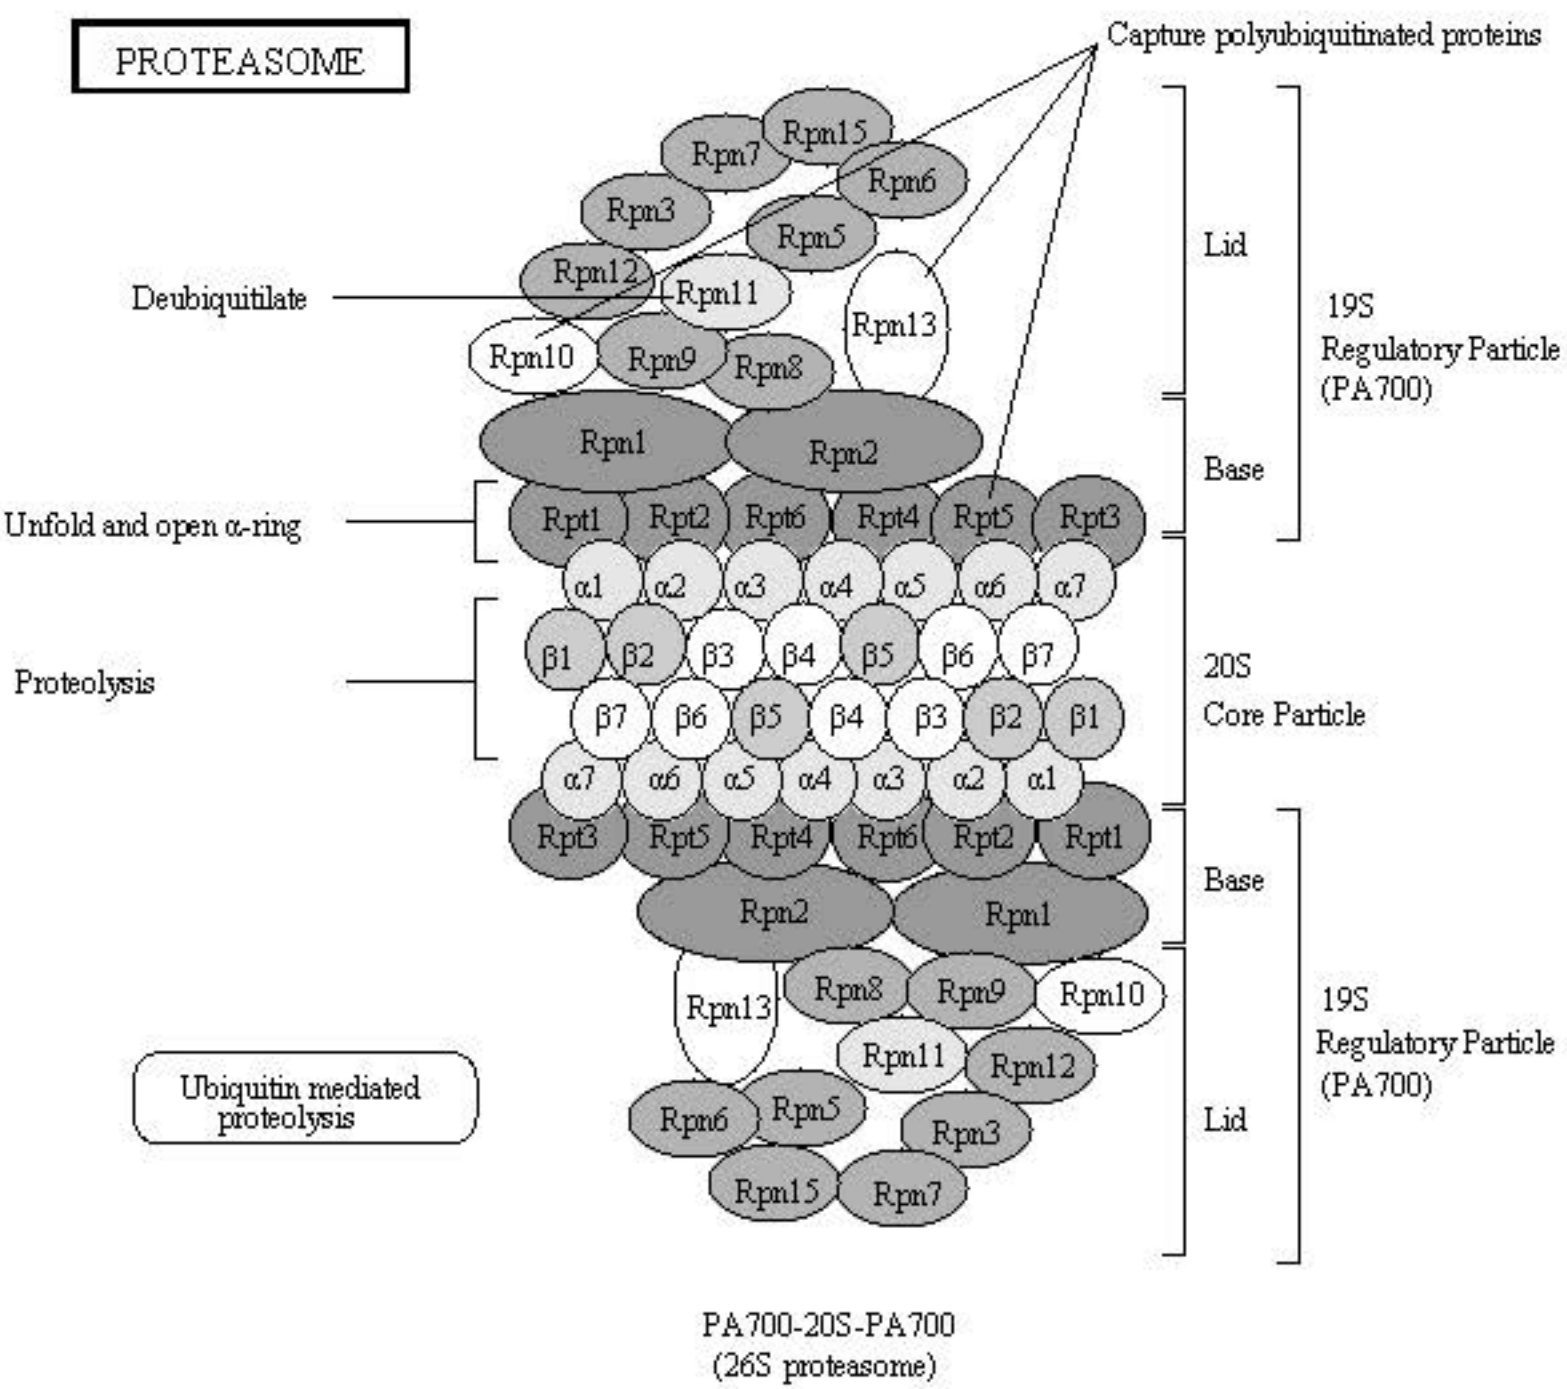

**Regulatory Particles**

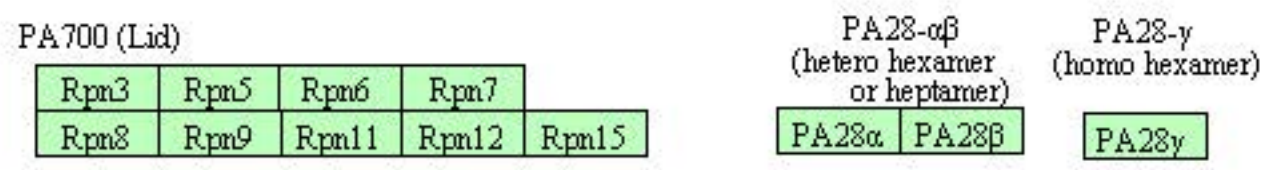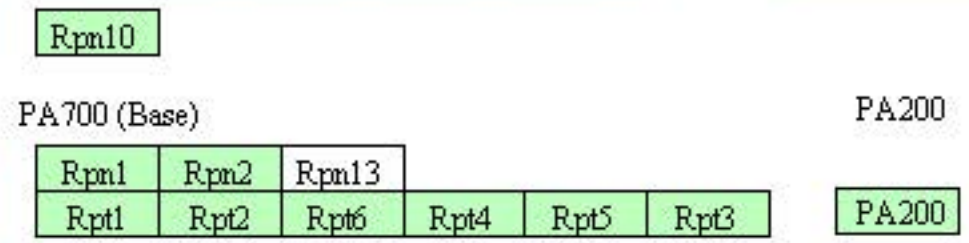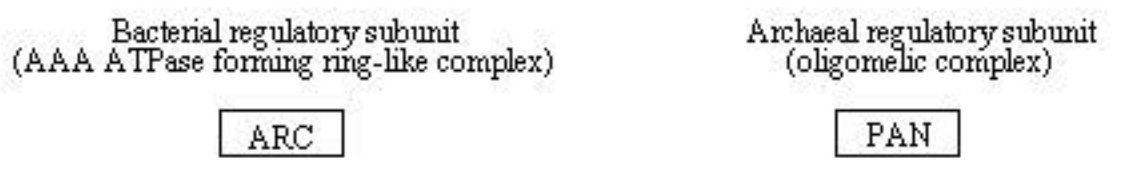

**Core Particles (20S proteasome)**

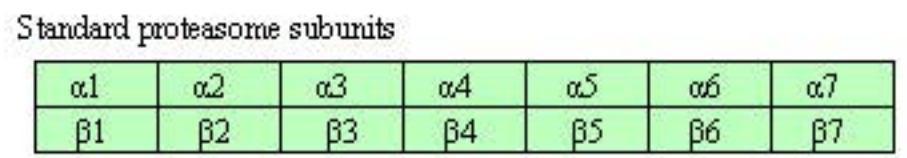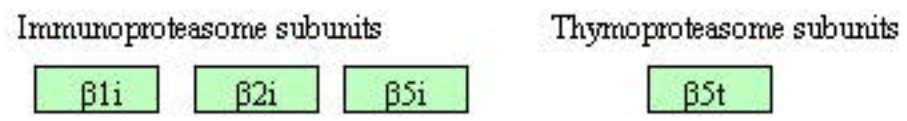

**Prokaryotic 20S subunits**

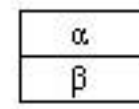

**Formation of immunoproteasomes**

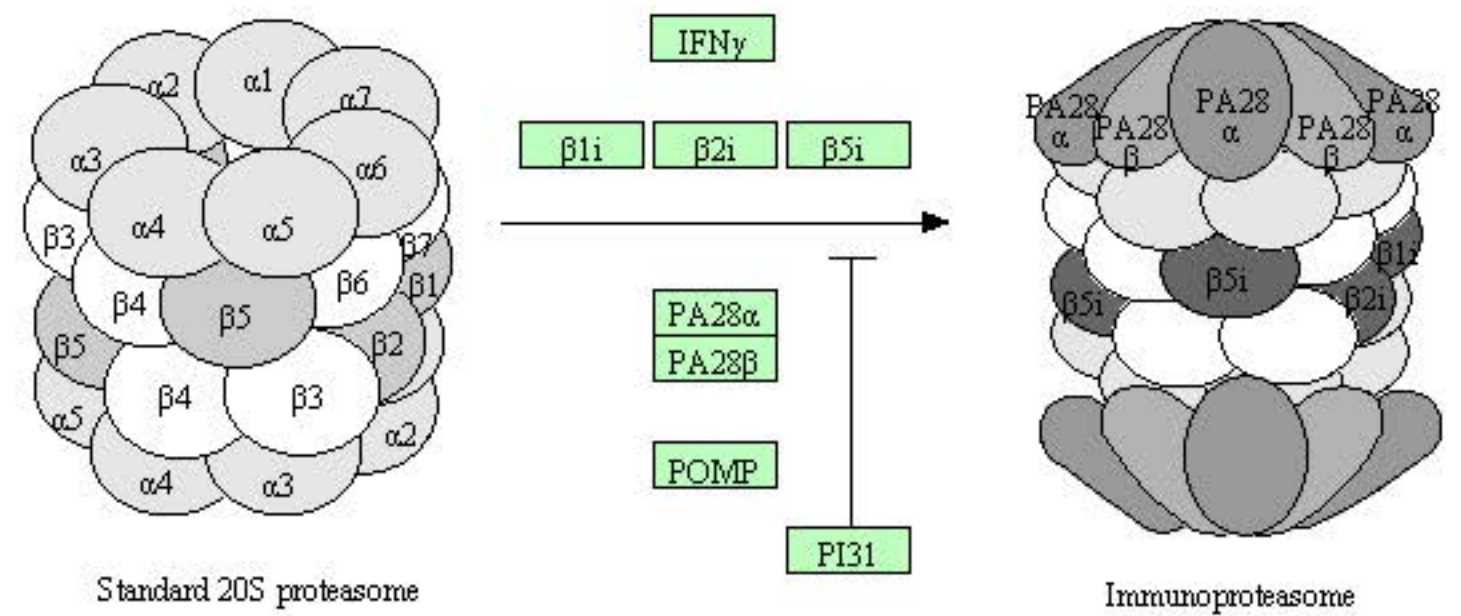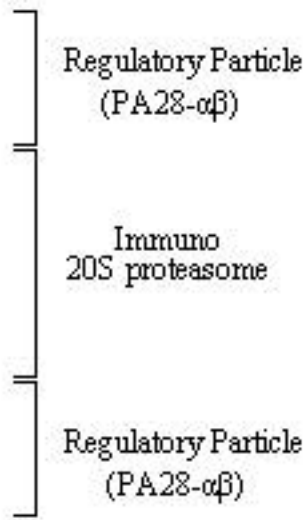

**RIBOSOME**

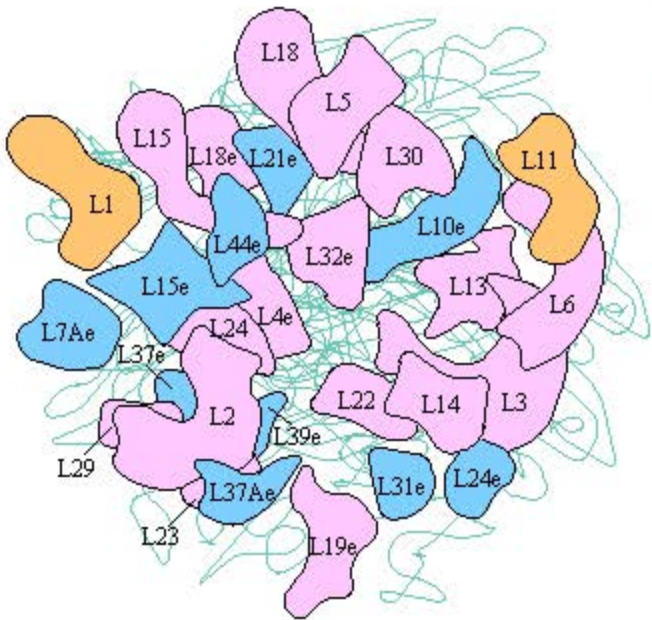

Large subunit (*Haloarcula marismortui*)

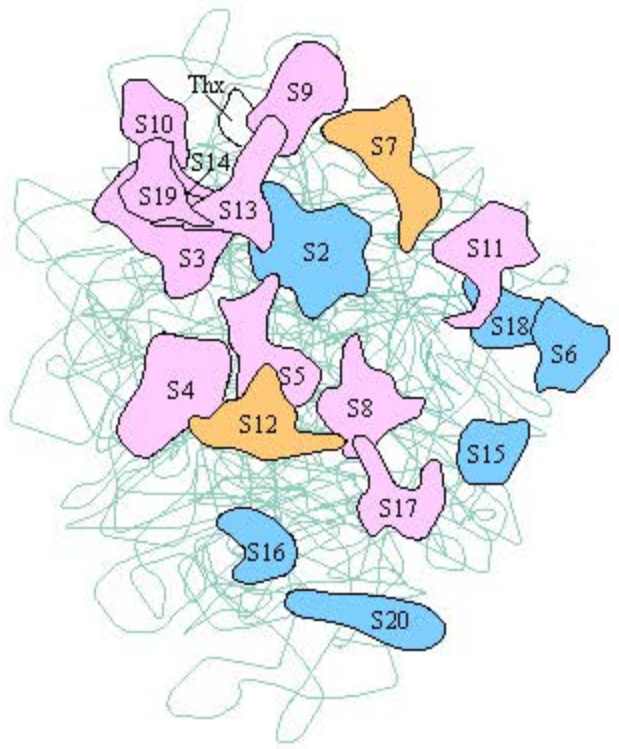

Small subunit (*Thermus aquaticus*)

**Ribosomal RNAs**

|                    |     |    |      |     |
|--------------------|-----|----|------|-----|
| Bacteria / Archaea | 23S | 5S |      | 16S |
| Eukaryotes         | 25S | 5S | 5.8S | 18S |

**Ribosomal proteins**

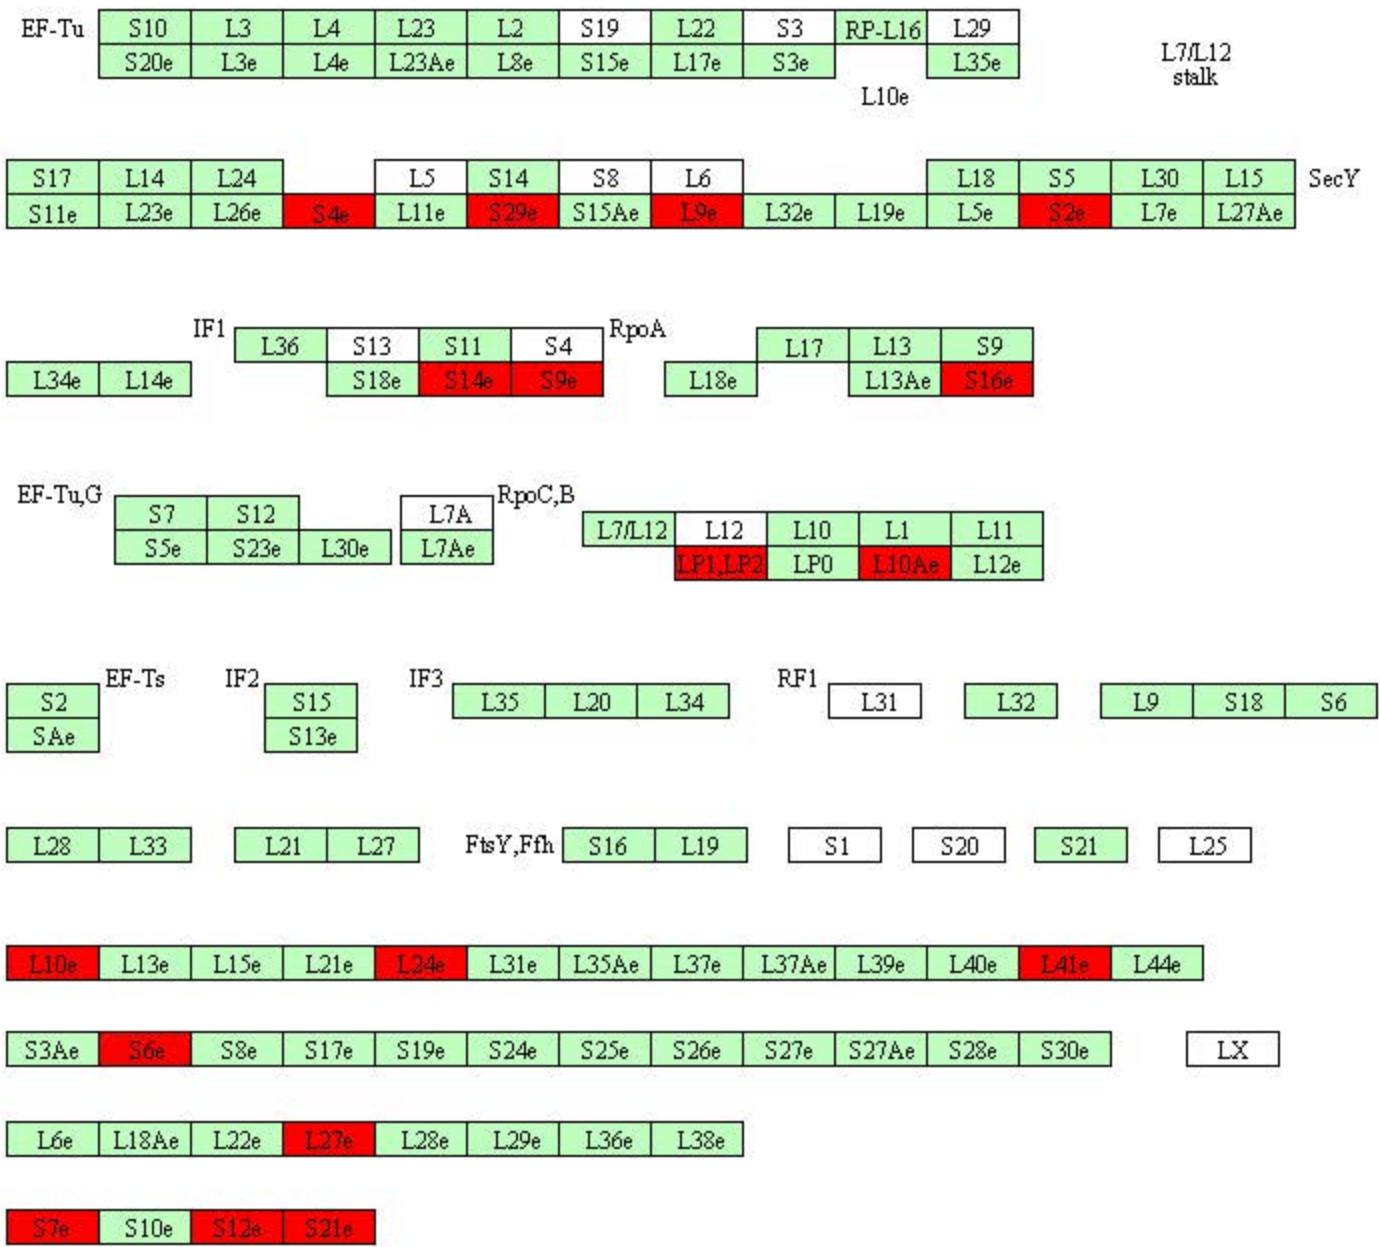

Supplement: NIHMS668708-supplement-Supp_Figures.pdf [file NIHMS668708-supplement-Supp_Figures.pdf]
